# Supplementary material
Source: PubMed Central journal article supplement (PMC10230290)
Supplement: kfad033_supplementary_data.pdf [file kfad033_supplementary_data.pdf]

## Supplemental Figures

# **Pulmonary Immune Response Regulation, Genotoxicity, and Metabolic Reprogramming by Menthol and Tobacco flavored E-cigarette Exposures in Mice**

Thivanka Muthumalage and Irfan Rahman

<sup>1</sup>Department of Environmental Medicine, School of Medicine and Dentistry, University of Rochester Medical Center, Rochester, NY, USA

ORCID IDs: 0000-0003-4648-9529 (TM)

0000-0003-4648-9529 (IR)

### **Address for Correspondence:**

\* Irfan Rahman, Ph.D.

Department of Environmental Medicine

University of Rochester Medical Center

Box 850, 601 Elmwood Avenue

Rochester 14642, NY, USA

E-mail: [irfan\\_rahman@urmc.rochester.edu](mailto:irfan_rahman@urmc.rochester.edu)

**Supplementary Figure 1: Full blots for Figs 6a,d**

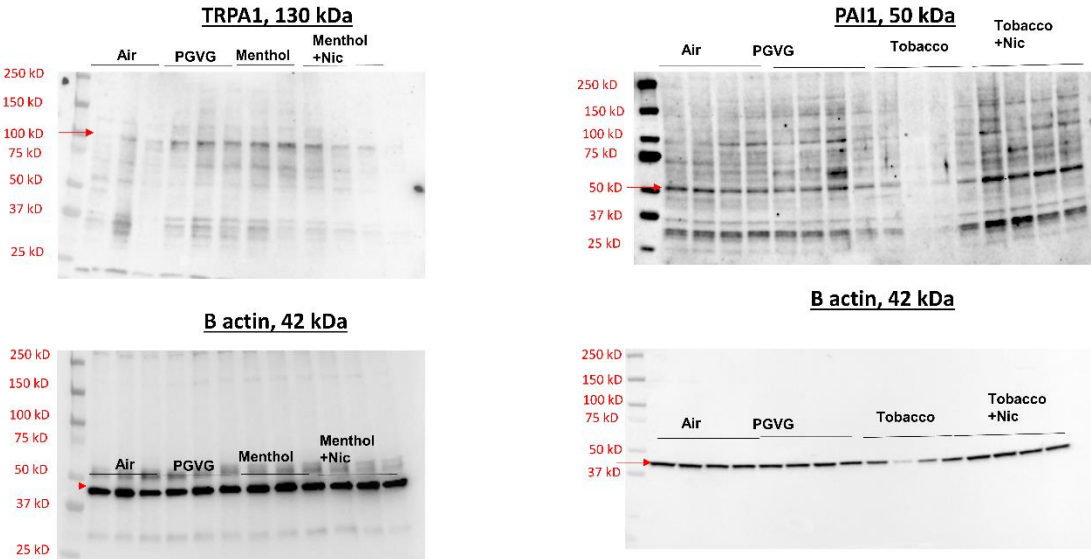

**Supplementary Figure 1**

Full images of western blots for TRPA1 and PAI1 of mouse lung homogenate samples from Air, PGVG, Menthol, Menthol + Nicotine, Tobacco, Tobacco +Nicotine groups. Blots were stripped and probed with loading control  $\beta$  actin for normalization (N=3-4/group).

## Supplementary Figure 2: Full blots for Figs 6b, c

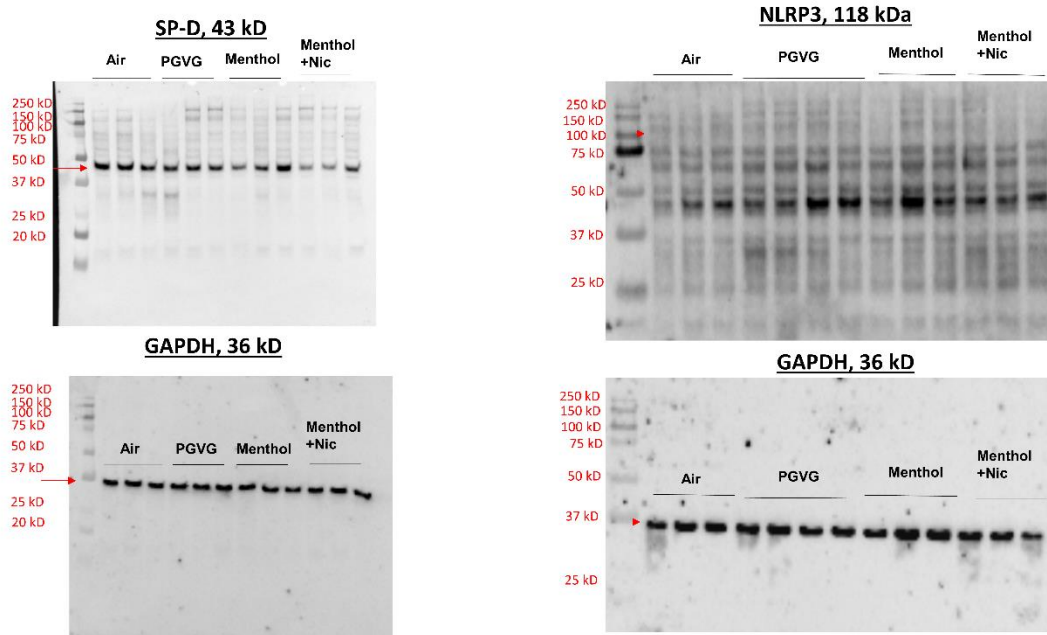

## Supplementary Figure 2

Full images of western blots for SP-D and NLRP3 of mouse lung homogenate samples from Air, PGVG, Menthol, Menthol + Nicotine, Tobacco, Tobacco + Nicotine groups. Blots were stripped and probed with loading control GAPDH for normalization (N=3-4/group).
